# Supplementary material for: Procedure for Handling and Storage of Onchocerca volvulus Microfilariae Obtained from Skin Snips for Downstream Genetic Work
Source: MDPI journal article supplement (doi:10.3390/tropicalmed8090445), 2023-09-12
Supplement: s1 [file s1]

# Supplemental File: Procedure for handling and storage of *Onchocerca volvulus* microfilariae obtained from skin snips for downstream genetic work

Shannon M. Hedtke <sup>1,\*</sup>, Anusha Kode <sup>1</sup>, Tony Ukety <sup>2</sup>, J  l Lonema Mande <sup>2</sup>, Germain Masikini Abhafule <sup>2</sup>, Anirwoth Raci   <sup>2</sup>, Claude Baga Uvon <sup>2</sup>, Stephen R. Jada <sup>3</sup>, An Hotterbeek   <sup>4</sup>, Joseph Nelson Siewe Fodjo <sup>4</sup>, Makedonka Mitreva <sup>5</sup>, Wilson Sebit   <sup>6</sup>, Robert Colebunders <sup>4</sup>, Warwick N. Grant <sup>1</sup> and Annette C. Kuesel <sup>7</sup>

<sup>1</sup> Department of Environment and Genetics, La Trobe University, Bundoora, Victoria, Australia; [S.Hedtke@latrobe.edu.au](mailto:S.Hedtke@latrobe.edu.au) (S.M.H.), [A.Kode@latrobe.edu.au](mailto:A.Kode@latrobe.edu.au) (A.K.), [W.Grant@latrobe.edu.au](mailto:W.Grant@latrobe.edu.au) (W.N.G.)

<sup>2</sup> Centre de Recherche en Maladies Tropicales (CRMT), Rethy, Ituri, Democratic Republic of the Congo [tony.ukety@gmail.com](mailto:tony.ukety@gmail.com) (T.U.), [joel.mande6@gmail.com](mailto:joel.mande6@gmail.com) (J.L.M.)

<sup>3</sup> Amref South Sudan, P.O. 30125 Juba, Republic of South Sudan; [Stephen.Jada@amref.org](mailto:Stephen.Jada@amref.org) (S.R.J.)

<sup>4</sup> Global Health Institute, University of Antwerp, Antwerp, Belgium; [an.hotterbeekx@uantwerpen.be](mailto:an.hotterbeekx@uantwerpen.be) (A.H.); [JosephNelson.SieweFodjo@uantwerpen.be](mailto:JosephNelson.SieweFodjo@uantwerpen.be) (J.N.S.F.); [robert.colebunders@uantwerpen.be](mailto:robert.colebunders@uantwerpen.be) (R.C.)

<sup>5</sup> Department of Medicine, Washington University in St. Louis and McDonnell Genome Institute, St. Louis, Missouri, U.S.A.; [mmitreva@wustl.edu](mailto:mmitreva@wustl.edu) (M.Mi.)

<sup>6</sup> National Public Health Laboratory, Juba, Republic of South Sudan; [Wilsonladu0@gmail.com](mailto:Wilsonladu0@gmail.com) (W.S.)

<sup>7</sup> UNICEF/UNDP/World Bank/World Health Organization Special Programme for Research and Training in Tropical Diseases (TDR), World Health Organization, Geneva, Switzerland (retired as of March 2023); [kuesela@who.int](mailto:kuesela@who.int) (A.C.K.)

\* Correspondence: [S.Hedtke@latrobe.edu.au](mailto:S.Hedtke@latrobe.edu.au) (S.M.H.)

## Source Record Forms for :

- (1) 4 skin snips taken per participant : right (R) and left (L) iliac crest (IC), right and left calf;
- (2) 2 skin snips taken per participant : right (R) and left (L) iliac crest (IC).

Health District \_\_\_\_\_ Village \_\_\_\_\_ Visit \_\_\_\_\_

Snip Date \_\_\_\_/\_\_\_\_/20\_\_ FIRST snip time: \_\_\_\_:\_\_\_\_ LAST snip time: \_\_\_\_:\_\_\_\_ Snipping technician \_\_\_\_\_

FIRST Count Date \_\_\_\_/\_\_\_\_/20\_\_ FIRST count time: \_\_\_\_:\_\_\_\_ Reading technician \_\_\_\_\_

[illegible]

**Health district** \_\_\_\_\_ **Village** \_\_\_\_\_ **Visit** \_\_\_\_\_

**Snip Date**         /   /20       **FIRST snip time:**    :    **LAST snip time:**    :       **Snipping technician**                     

**FIRST Count Date** \_\_\_/\_\_\_/20\_\_ **FIRST count time:** \_\_\_\_:\_\_\_\_ **Reading technician** \_\_\_\_\_

[illegible]
